# Supplementary material for: Influence and mechanism of different molecular weight organic molecules in natural water on ultrafiltration membrane fouling reversibility
Source: Royal Society of Chemistry journal article supplement (doi:10.1039/c6ra17376d), 2016-01-01
Supplement: c6ra17376d1.pdf [file c6ra17376d1.pdf]

**The influence and the mechanism of different molecular weight  
organic in natural water to the ultrafiltration membrane fouling  
reversibility**

Weiguang Sun<sup>1,2</sup>, Jun Nan<sup>1\*</sup>, Jia Xing<sup>2</sup>, Jiayu Tian<sup>1\*</sup>

<sup>1</sup>State Key Laboratory of Urban Water Resource and Environment, School of Municipal and Environmental Engineering, Harbin Institute of Technology, Harbin 150090, PR China

<sup>2</sup> Heilongjiang Environmental Protection Academy of Science, Harbin 150056, China

Supplementary Information: 2 pages, 1 figure, 1 table.

---

\* Corresponding author: Tel.: +86 451 86084169; Fax: +86 451 86283001;  
Email: nanjun209@126.com.  
tjy800112@163.com.

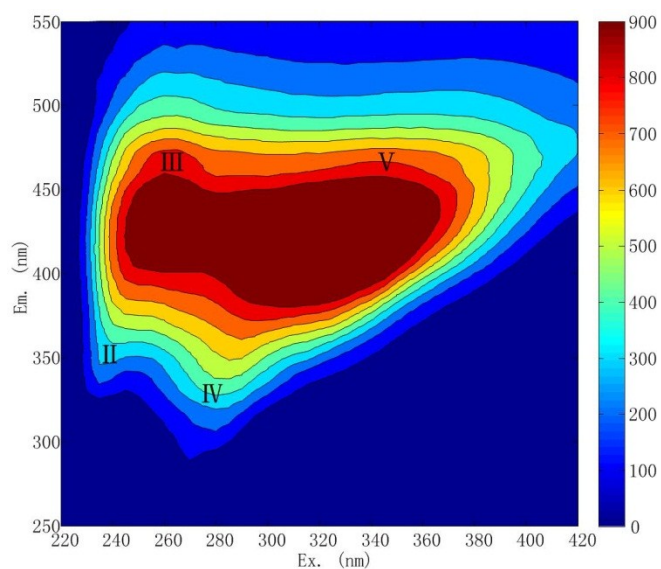

**Fig. S1** A typical EEM for the MuDan River raw water sample II : tyrosine-like proteins, III: fulvic-like substances, IV: protein-like substances, V : humic-like substances

**Table S1- Raw water quality parameters on December 2015**

| Parameters          | SongHua River Water |
|---------------------|---------------------|
| Temperature (°C)    | 0.1                 |
| pH                  | 7.3                 |
| Turbidity (NTU)     | 67.35               |
| DOC (mg/L)          | 8.95                |
| Conductivity (ms/m) | 97.3                |
| UV <sub>254</sub>   | 0.097               |
